# Supplementary material for: Assessing the Impact of Novel BRCA1 Exon 11 Variants on Pre-mRNA Splicing
Source: MDPI journal article supplement (doi:10.3390/cells13100824), 2024-05-11
Supplement: s1 [file s1]

```
>seq-wt 1019 T
AAACATGTAATGATAGGCGGACTCCAGCACAGAAAAAAGGTAGATCTGAATGCTGATCCCCTGTGTGAGAGAAAAGAATGGAA
>seq-mut 1019 C
AAACATGTAATGATAGGCGGACTCCAGCACAGAAAAAAGGCAGATCTGAATGCTGATCCCCTGTGTGAGAGAAAAGAATGGAA
```

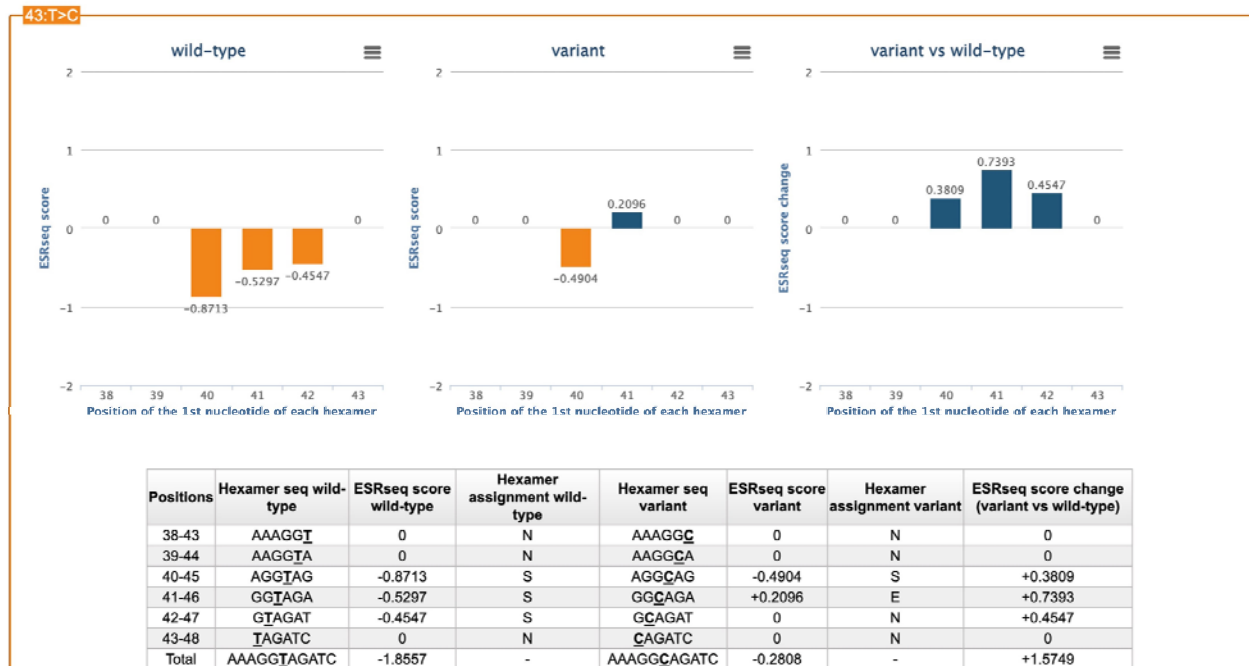

**Figure S1. In silico analysis of the splicing regulatory change in the BRCA1 exon 11 caused by the c.1019T>C transition.**

HExoSplice2 analysis was performed on an 85 nucleotide sequence surrounding the c.1019T>C variant at position 42. The analysis shows the transition results in a change from negative to positive ESRseq scores for hexamer sequences. This suggests the c.1019T>C variant may promote exon inclusion by switching the splicing regulatory factors binding nearby from repressors to activators of BRCA1 exon 11 splicing.

```

>seq-wt 2363T
GTACTGATTATGGCACTCAGGAAAGTATCTCGTTACTGGAAGTTAGCACTCTAGGGAAGGCAAAAACAGAACCAATAAATGTGT
>seq-mut 2363G
GTACTGATTATGGCACTCAGGAAAGTATCTCGTTACTGGAAGGTAGCACTCTAGGGAAGGCAAAAACAGAACCAATAAATGTGT

```

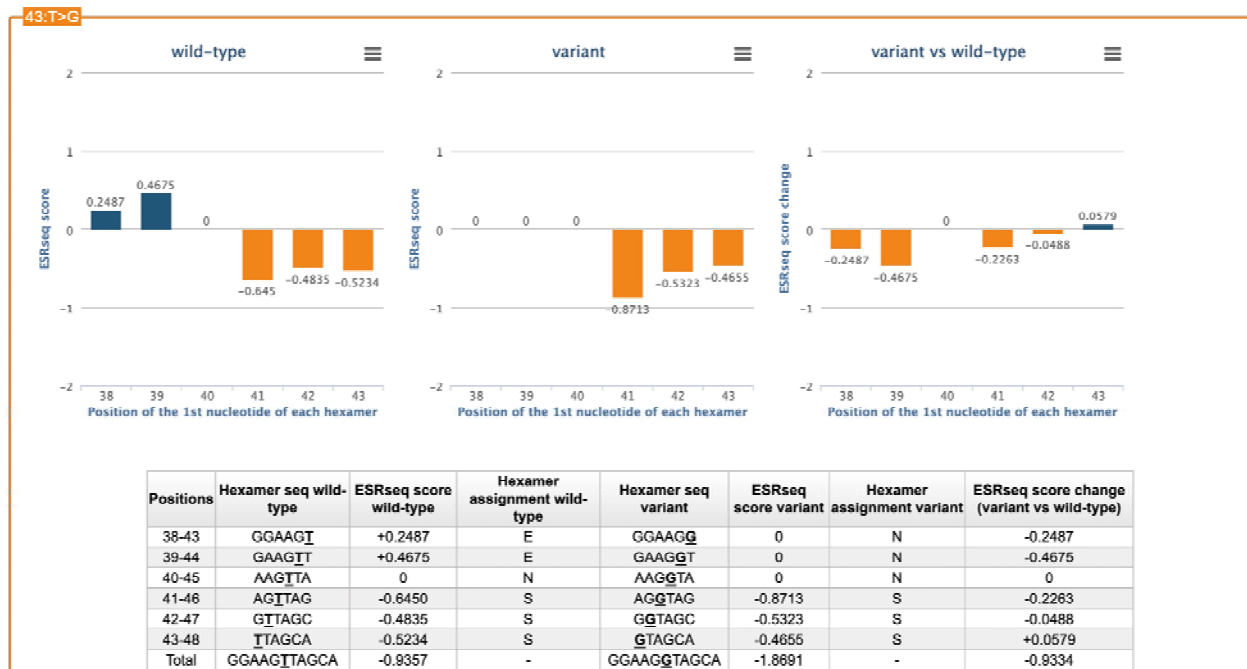

**Figure S2.** In silico analysis of the splicing regulatory change in the BrcA1 exon 11 caused by the c.2363T>G transversions.

HExoSplice2 analysis was performed on an 85 nucleotide sequence surrounding the c.2363T>G variant at position 42. The analysis shows the transversion results in lower ESRseq scores for hexamer sequences, indicating increased silencing properties of splicing regulatory factors binding nearby. This suggests the c.2363T>G variant may promote exon skipping.

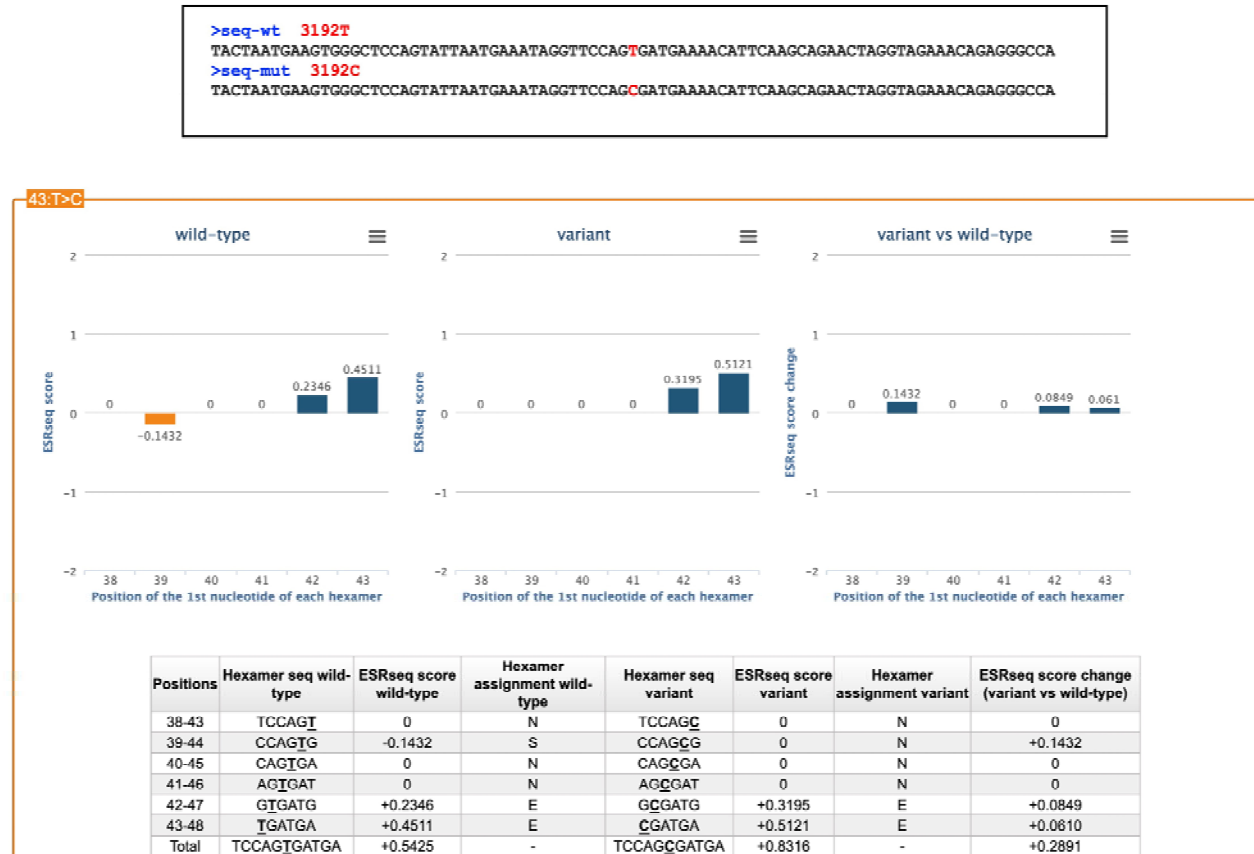

**Figure S3.** In silico analysis of the splicing regulatory change in the *BrcA1* exon 11 caused by the c.3192T>C transition.

HExoSplice2 analysis was performed on 85 nucleotide sequence surrounding the c.3192T>C variant located at position 42. The analysis shows the transition has minimal effect on predicted binding sites for exonic splicing regulatory factors. No dramatic changes in ESRseq scores for hexamer sequences were observed, with the overall positive trend being maintained. This suggests the c.3192T>C variant is unlikely to significantly alter recruitment of splicing factors that modulate inclusion of *BRCA1* exon 11.

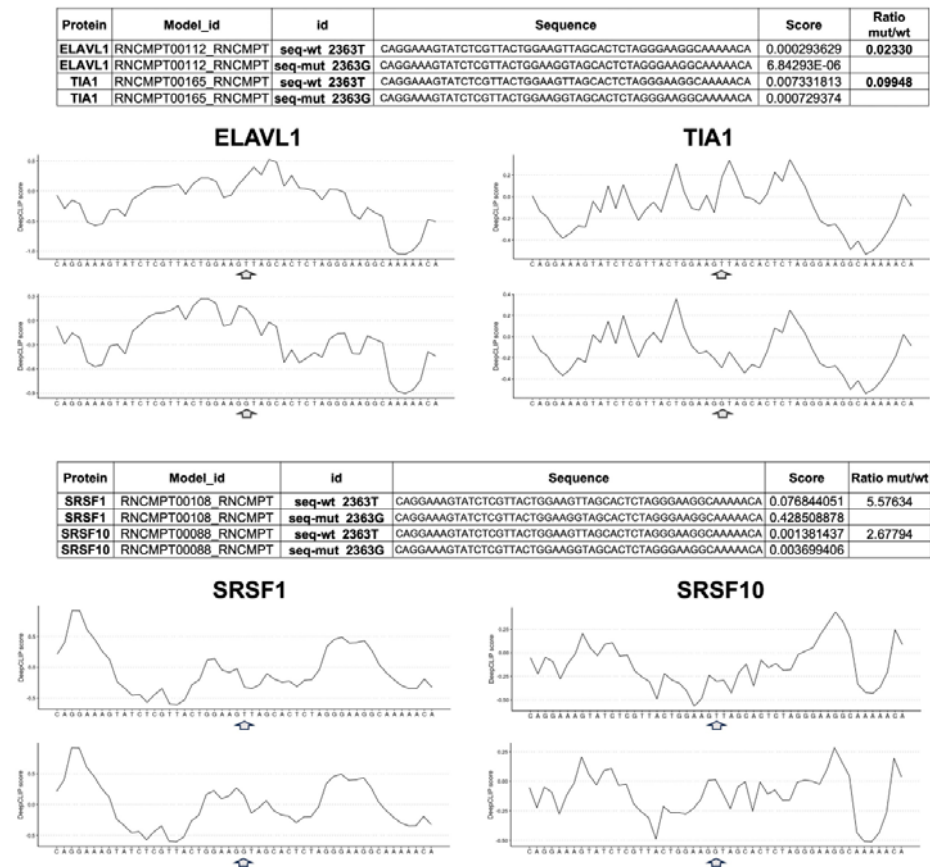

**Figure S4. Predicted binding strength of splicing factors ELAVL1, TIA1, SRSF1, and SRSF10 for c.2363T>G transversion using DeepCLIP.**

Analysis by DeepCLIP (<https://deepclip-web.compbio.sdu.dk/>) using the pretrained models of the indicated splicing factors and 85-nt sequences (-42/+42 around the variation). The profiles for the different factors (ELAVL1, TIA1, SRSF1, and SRSF10) predict the binding strength of each of them for the c.2363T>G transversion (indicated by a gray arrow) versus the relative seq-wt sequence.
